# Supplementary material
Source: PubMed Central journal article supplement (PMC6428608)

# Discovery Sample Analysis

**a. *Citrobacter* Quantification**

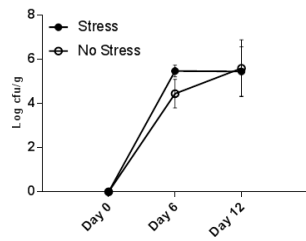

**b. iNOS**

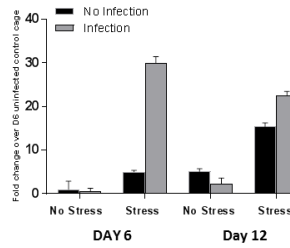

**c. TNF $\alpha$**

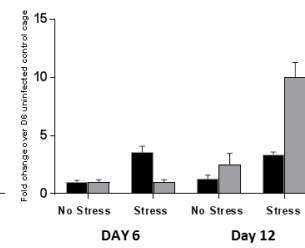

**d. IL-1 $\beta$**

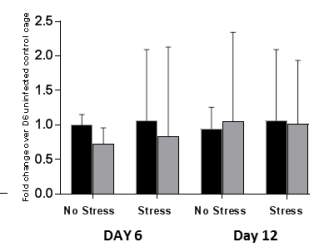

**e. IFN $\gamma$**

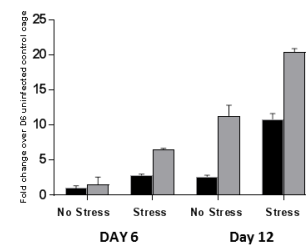

**f. IL-22**

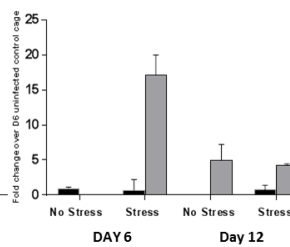

**g. REG3 $\gamma$**

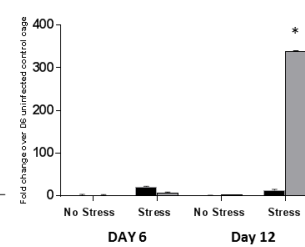

**h. Histology**

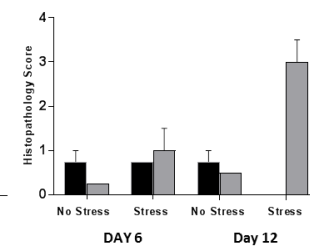

# Validation Sample Analysis

**i. *Citrobacter* Quantification**

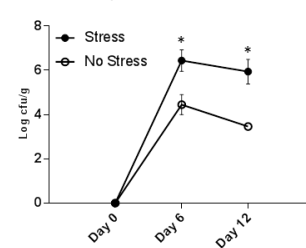

**j. iNOS**

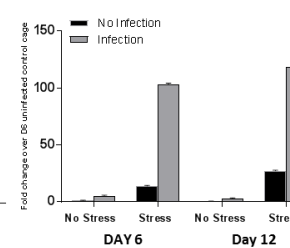

**k. TNF $\alpha$**

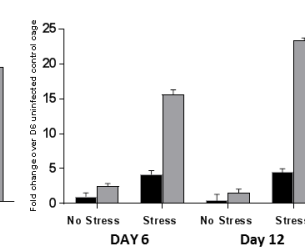

**l. IL-1 $\beta$**

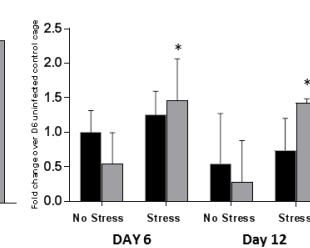

**m. IFN $\gamma$**

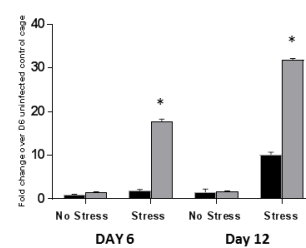

**n. IL-22**

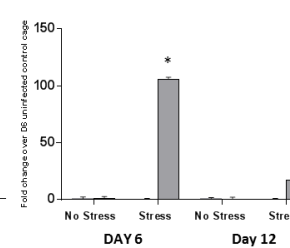

**o. REG3 $\gamma$**

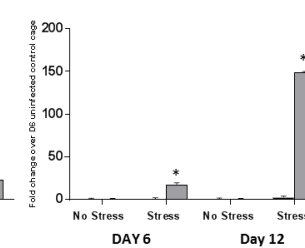

**p. Histology**

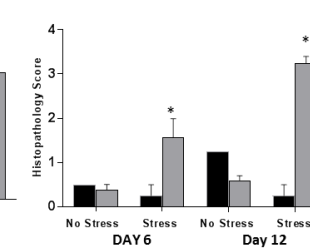

Supplement: NIHMS1515202-supplement-Supplemental_Figure_1.pdf [file NIHMS1515202-supplement-Supplemental_Figure_1.pdf]
