# Supplementary material
Source: PubMed Central journal article supplement (PMC6428608)
Supplement: NIHMS1515202-supplement-10.pdf [file NIHMS1515202-supplement-10.pdf]

### **Supplemental Figure 1: Discovery and validation sample analyses for colonic inflammation**

a. *Citrobacter rodentium* levels were not significantly affected by stress in the discovery samples. b and c. iNOS and TNF $\alpha$  main effect of stress exposure ( $p < .05$ ). d. IL-1 $\beta$ . e. IFN $\gamma$  main effect of stress and infection exposure ( $p < .05$ ). f. IL-22 main effect of infection exposure ( $p < .05$  stress). g. REG3 $\gamma$  \* $p < .05$  infection x sac day interaction. h. Histopathology. i. *Citrobacter rodentium* increased with stress in the validation samples \* $p < .05$ . j and k. iNOS and TNF $\alpha$  main effect of stress and infection exposure ( $p < .05$ ). l. IL-1 $\beta$  \* $p < .05$  stress x infection interaction. m. IFN $\gamma$  \* $p < .05$  stress x infection interaction. n. IL-22 \* $p < .05$  stress x infection interaction. o. REG3 $\gamma$  \* $p < .05$  stress x infection interaction. p. Histopathology \* $p < .05$  stress x infection interaction.

### **Supplemental Figure 2: Discovery and validation sample analyses for SCFA levels and SCFA receptor expression**

a-c. Acetic acid, Butyric acid, and Propionic acid were not significantly affected by stress or infection in the discovery samples. d. GPR43 receptor expression qPCR analysis main effect of infection exposure ( $p < .05$ ). e. GPR41 receptor expression qPCR analysis \* $p < .05$  stress x infection interaction. f. GPR109A receptor expression qPCR. g. Acetic acid analysis main effect of stress ( $p < .05$ ). h. Butyric acid analysis \* $p < .05$  infection day 12 compared to infection day 6. i. Propionic acid analysis \* $p < .05$  stress and infection on day 6 and 12 compared to stress and no infection day 6 and 12. j. GPR43 receptor expression qPCR analysis main effect of infection

exposure ( $p < .05$ ). k. GPR41 receptor expression qPCR analysis  $*p < .05$  stress x infection interaction. l. GPR109A receptor expression qPCR analysis  $*p < .05$  stress x infection interaction.

### **Supplemental Figure 3: Genera combined sample analysis**

a-f. The relative abundances of *Akkermansia*, *Anaerostipes*, *Butyricicoccus*, *Coprococcus*, *Parabacteroides*, and *SMB53* decreased with stress exposure ( $p < .05$ ). g and h. The relative abundances of *Bacteroides* and *Butyricimonas* decreased with stress exposure ( $p < .05$ ) and decreased when challenged with the infection ( $p < .05$ ). i and j. The relative abundances of *Odoribacter* and *Sutterella* increased with stress exposure ( $p < .05$ ).

### **Supplemental Figure 4: Genera combined sample analysis**

a-c. The relative abundances of *AF12*, *Helicobacter*, and *Prevotella* decreased when challenged with the infection ( $p < .05$ ) and increased with stress exposure ( $p < .05$ ). d-k. The relative abundances of *Anaerococcus*, *Anaeroplasma*, *Bradyrhizobium*, *Enhydrobacter*, *Mucispirillum*, *Oscillospira*, *Peptoniphilus*, and *Roseburia* decreased when challenged with the infection ( $p < .05$ ). l-o. The relative abundances of *Enterobacter*, *Flavobacterium*, *Flexispira*, and *Trabulsiella* increased when challenged with the infection ( $p < .05$ ).

### **Supplemental Figure 5: Genera discovery sample analysis**

a-f. The relative abundances of *Akkermansia*, *Anaerostipes*, *Butyricicoccus*, *Coprococcus*, *Parabacteroides*, and *SMB53* were not significantly affected with stress or infection exposure. g. The relative abundance of *Bacteroides* decreased with stress exposure ( $p < .05$ ). h. The relative abundance of *Butyricimonas* was not significantly affected with stress or infection exposure. i. The relative abundance of *Odoribacter* was not significantly affected with stress or infection exposure. j. The relative abundance of *Sutterella* increased with stress exposure ( $p < .05$ ).

#### **Supplemental Figure 6: Genera discovery sample analysis**

a-c. The relative abundances of *AF12*, *Helicobacter*, and *Prevotella* decreased when challenged with the infection ( $p < .05$ ) and increased with stress exposure ( $p < .05$ ). d-g. The relative abundances of *Anaerococcus*, *Anaeroplasma*, *Bradyrhizobium*, and *Enhydrobacter* were not significantly affected with stress or infection exposure. h. The relative abundance of *Mucispirillum* decreased when challenged with the infection ( $p < .05$ ). i-k. The relative abundances of *Oscillospira*, *Peptoniphilus*, and *Roseburia* were not significantly affected with stress or infection exposure. l. The relative abundance of *Enterobacter* increased when challenged with the infection ( $p < .05$ ). m. The relative abundance of *Flavobacterium* was not significantly affected with stress or infection exposure. n and o. The relative abundances of *Flexispira*, and *Trabulsiella* increased when challenged with the infection ( $p < .05$ ).

#### **Supplemental Figure 7: Genera validation sample analysis**

a. The relative abundance of *Akkermansia* decreased with stress exposure ( $p < .05$ ). b. The relative abundance of *Anaerostipes* decreased with stress exposure ( $p < .05$ ) and increased with infection exposure ( $p < .05$ ). c. The relative abundance of *Butyricicoccus* decreased with stress exposure ( $p < .05$ ). d. The relative abundance of *Coproccoccus* was not significantly affected with stress or infection exposure. e and f. The relative abundances of *Parabacteroides* and *SMB53* decreased with stress exposure ( $p < .05$ ). g and h. The relative abundances of *Bacteroides* and *Butyricimonas* decreased with stress exposure ( $p < .05$ ) and decreased with infection exposure ( $p < .05$ ). i and j. The relative abundances of *Odoribacter* and *Sutterella* increased with stress exposure ( $p < .05$ ).

### **Supplemental Figure 8: Genera validation sample analysis**

a-c. The relative abundances of *AF12*, *Helicobacter*, and *Prevotella* decreased when challenged with the infection ( $p < .05$ ) and increased with stress exposure ( $p < .05$ ). d-f. The relative abundances of *Anaerococcus*, *Anaeroplasma*, and *Bradyrhizobium* decreased when challenged with the infection ( $p < .05$ ). g. The relative abundance *Enhydrobacter* was not significantly affected with stress or infection exposure. h. The relative abundance of *Mucispirillum* decreased when challenged with the infection ( $p < .05$ ). i. The relative abundance of *Oscillospira* was not significantly affected with stress or infection exposure. j and k. The relative abundances of *Peptoniphilus* and *Roseburia* decreased when challenged with the infection ( $p < .05$ ). l and m. The relative abundances of *Enterobacter* and *Flavobacterium* increased when challenged with the infection ( $p < .05$ ). n. The relative abundance of *Flexispira* increased with stress exposure ( $p < .05$ ). o. The relative abundance of *Trabulsiella* increased when challenged with the infection ( $p < .05$ ).

**Supplemental Table 1. Sequences of primers and probes used for real-time PCR**

Primers and probes were purchased from (Thermo Fisher, Waltham, MA).
