# Supplementary material
Source: PubMed Central journal article supplement (PMC6428608)

# Genera Combined Sample Analysis

## Abundances decreased with stress

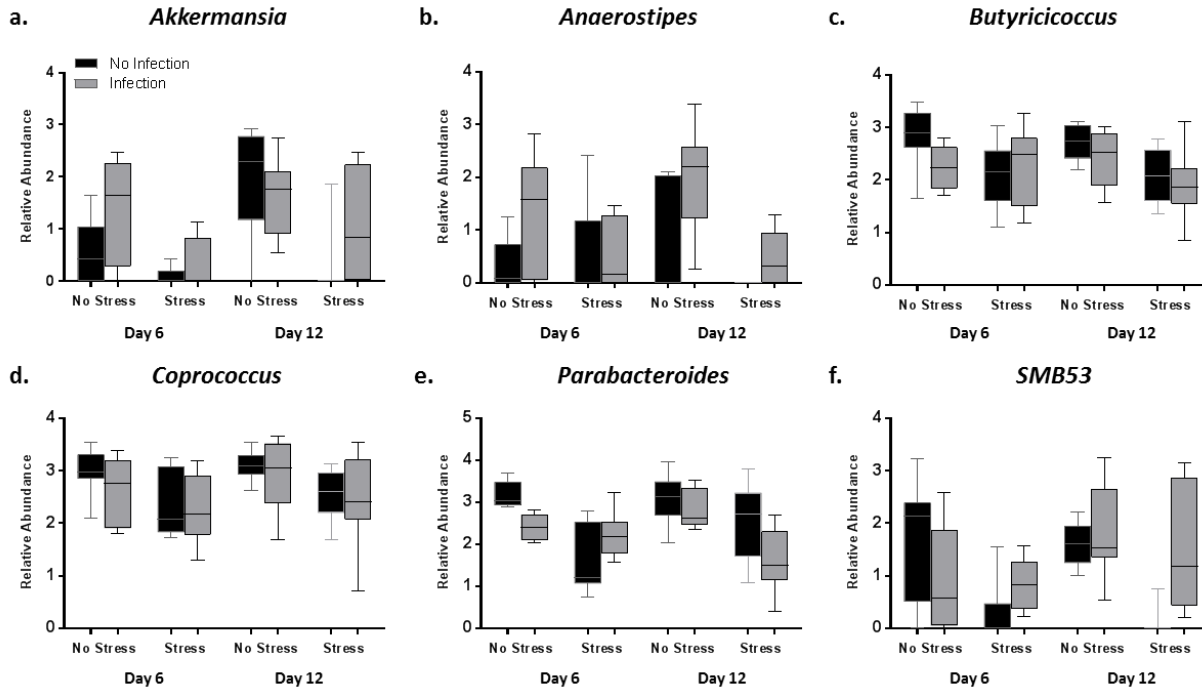

## Abundances decreased with stress and infection

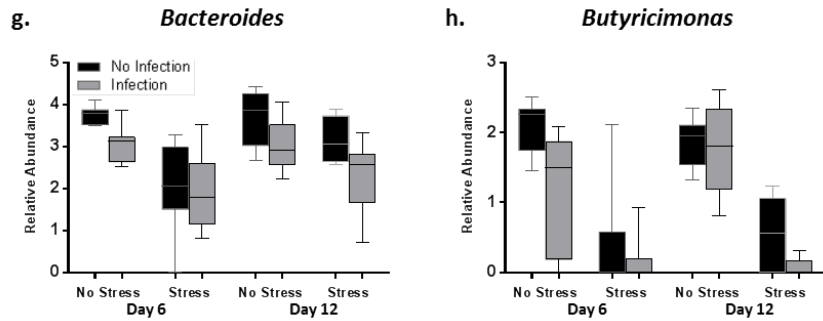

## Abundances increased with stress

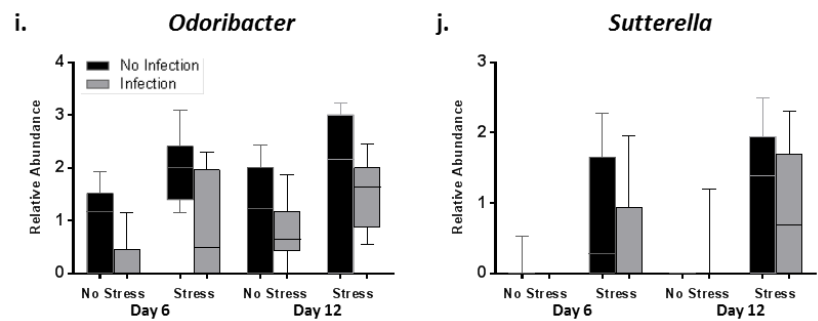

Supplement: NIHMS1515202-supplement-Supplemental_Figure_3.pdf [file NIHMS1515202-supplement-Supplemental_Figure_3.pdf]
