# Supplementary material
Source: PubMed Central journal article supplement (PMC6428608)

# Genera Combined Sample Analysis

## Abundances decreased with infection and increased with stress

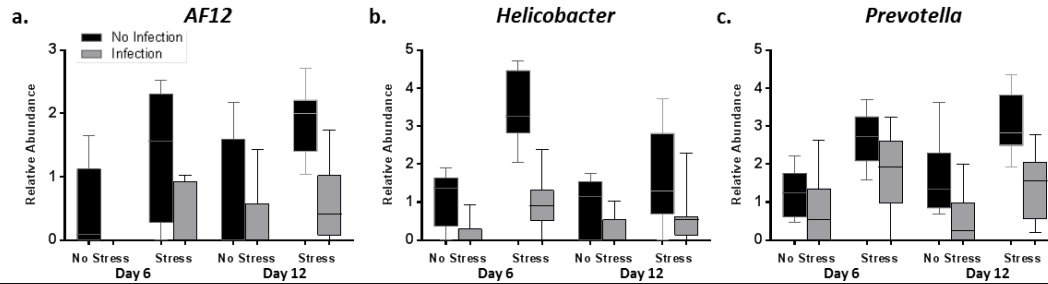

## Abundances decreased with infection

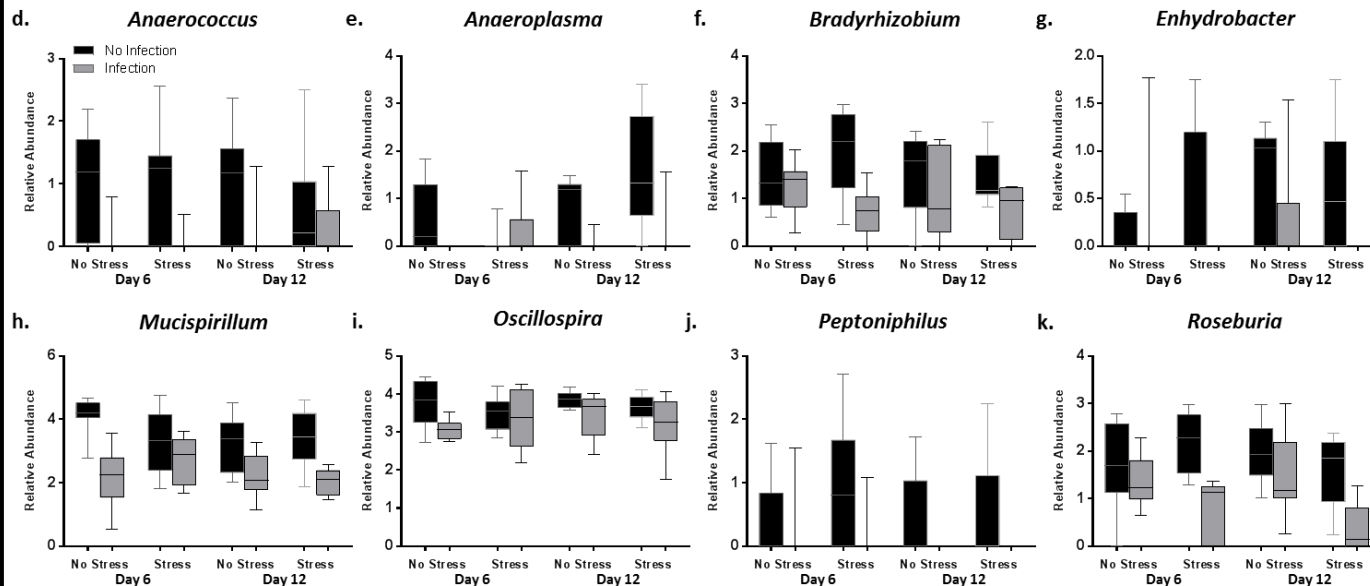

## Abundances increased with infection

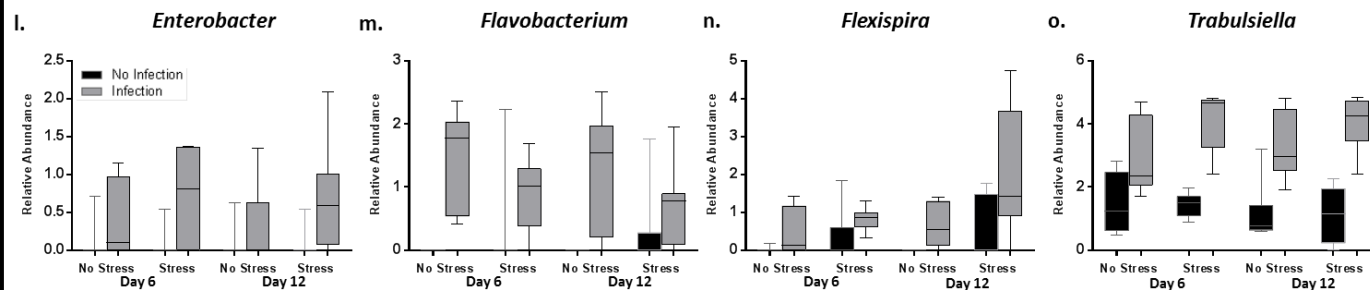

Supplement: NIHMS1515202-supplement-Supplemental_Figure_4.pdf [file NIHMS1515202-supplement-Supplemental_Figure_4.pdf]
