# Supplementary material
Source: PubMed Central journal article supplement (PMC6428608)

# Genera Discovery Sample Analysis

## Abundances increased with stress and decreased with infection

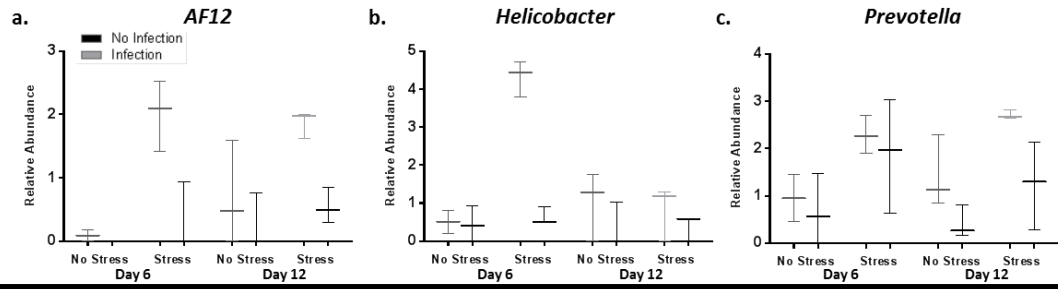

**d. Anaerococcus**

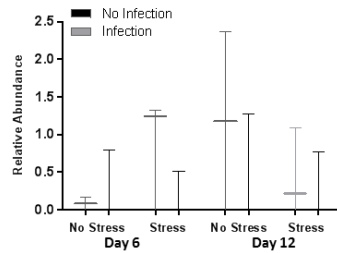

**e. Anaeroplasma**

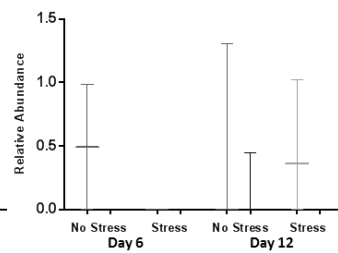

**f. Bradyrhizobium**

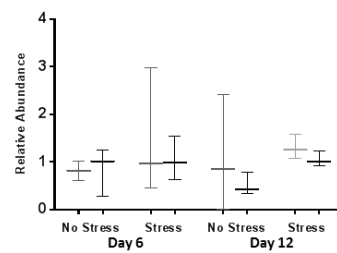

**g. Enhydrobacter**

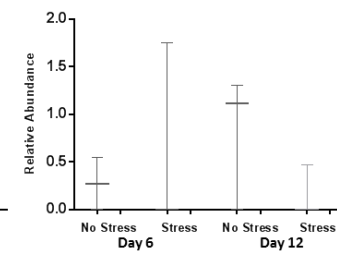

**h. Mucispirillum**

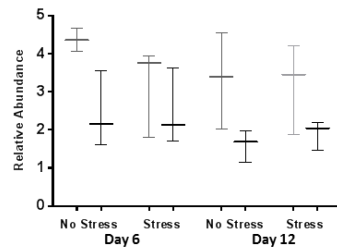

**i. Oscillospira**

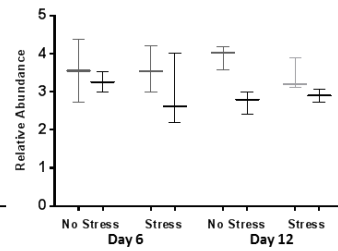

**j. Peptoniphilus**

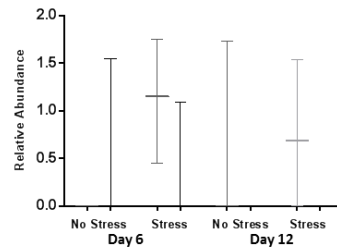

**k. Roseburia**

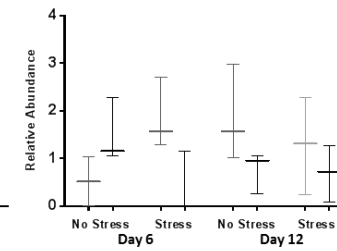

**l. Enterobacter**

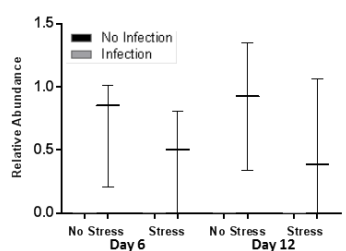

**m. Flavobacterium**

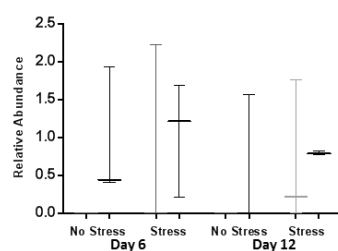

**n. Flexispira**

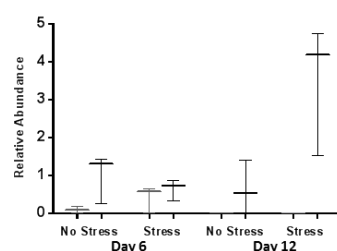

**o. Trabulsiella**

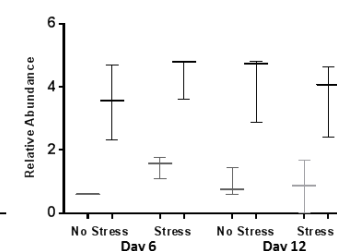

Supplement: NIHMS1515202-supplement-Supplemental_Figure_6.pdf [file NIHMS1515202-supplement-Supplemental_Figure_6.pdf]
