# Supplementary material
Source: PubMed Central journal article supplement (PMC6428608)

# Genera Validation Sample Analysis

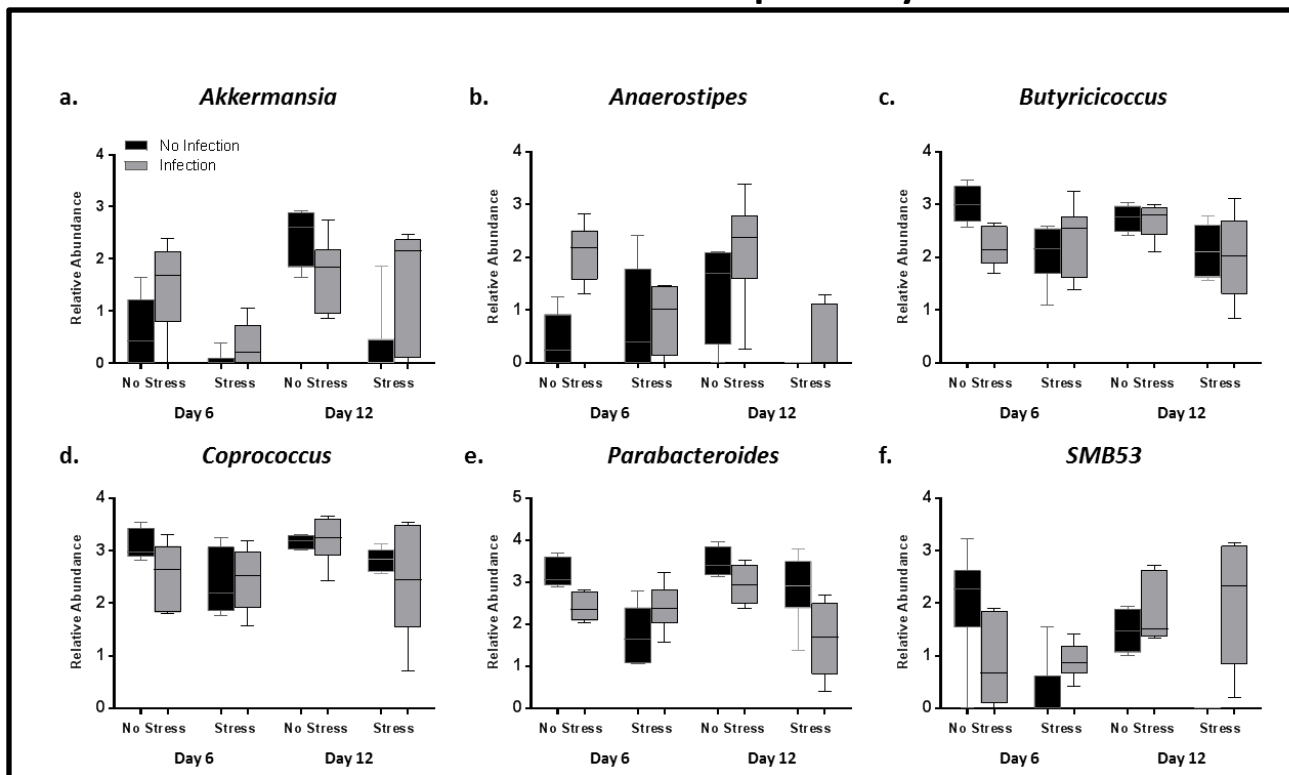

## Abundances decreased with stress and infection

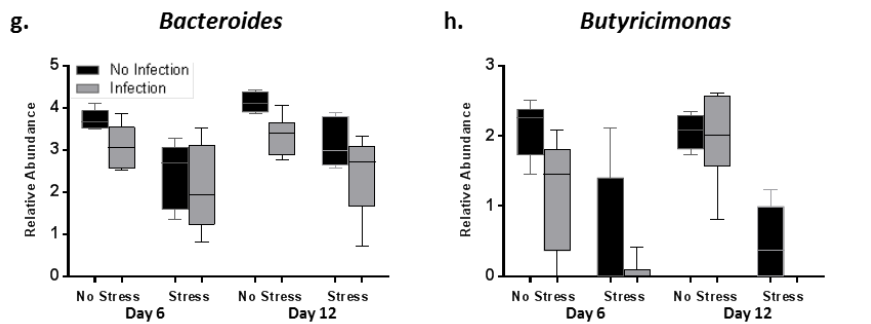

## Abundances increased with stress

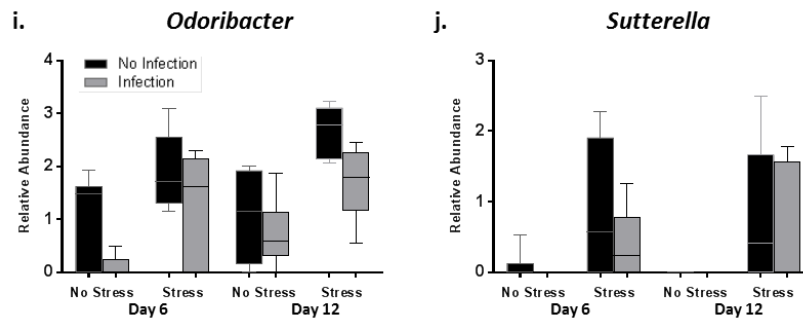

Supplement: NIHMS1515202-supplement-Supplemental_Figure_7.pdf [file NIHMS1515202-supplement-Supplemental_Figure_7.pdf]
