# Supplementary material
Source: PubMed Central journal article supplement (PMC6428608)

# Genera Validation Sample Analysis

Abundances increased with stress and decreased with infection

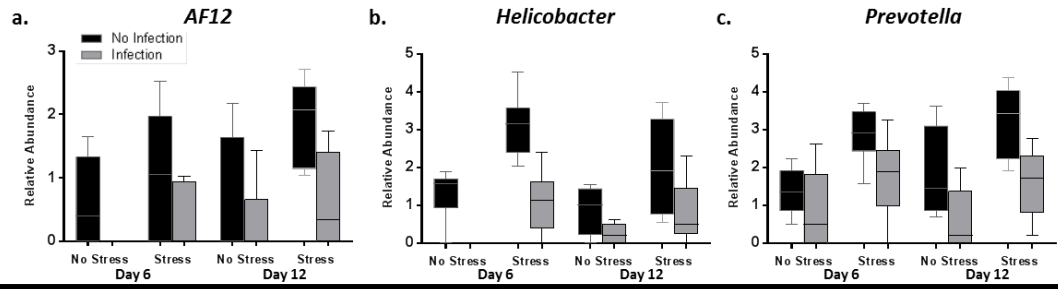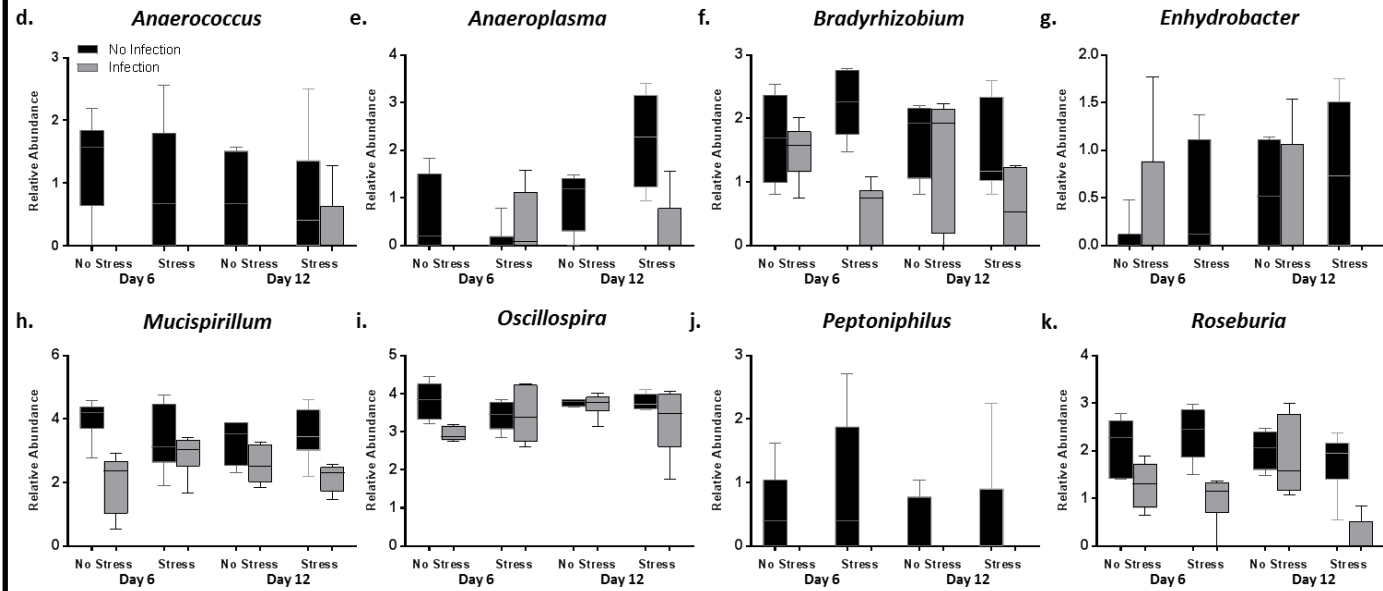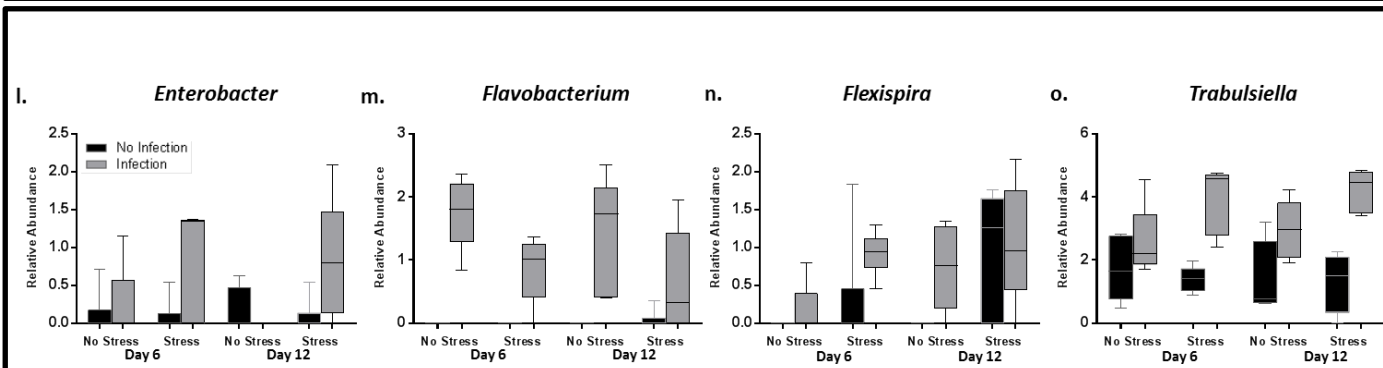

Supplement: NIHMS1515202-supplement-Supplemental_Figure_8.pdf [file NIHMS1515202-supplement-Supplemental_Figure_8.pdf]
