# Supplementary material
Source: PubMed Central journal article supplement (PMC6428608)
Supplement: NIHMS1515202-supplement-Supplemental_Table_1.pdf [file NIHMS1515202-supplement-Supplemental_Table_1.pdf]

| Primer or probe | Primer direction | Sequence                       | Average cycle detectable amplification |
|-----------------|------------------|--------------------------------|----------------------------------------|
| 18s             | Forward          | CGGCTACCACATCCAAGGAA           | Syber green 18.03                      |
|                 | Reverse          | GCTGGAATTACCGCGGCT             | TaqMan 15.53                           |
|                 | Probe            | TGCTGGCACCAGACTTGCCCTC         |                                        |
| IL-1 $\beta$    | Forward          | GGCCTCAAAGGAAAGAATCTATACC      | 32.55                                  |
|                 | Reverse          | GCTCTGGGCCATAGAACTGATG         |                                        |
| TNF $\alpha$    | Forward          | CTGTCTACTGAAC TTCGGGGTGAT      | 32.83                                  |
|                 | Reverse          | GGTCTGGGCCATAGAACTGATG         |                                        |
|                 | Probe            | ATGAGAAGTTCCCAAATGGCCTCCCTC    |                                        |
| iNOS            | Forward          | CAGCTGGGCTGTACAAACCTT          | 32.61                                  |
|                 | Reverse          | GTATTGCTTGGGATCCCACTCT         |                                        |
|                 | Probe            | ATGAAAGACGGCACCCACCCTG         |                                        |
| IFN $\gamma$    | Forward          | GATATCTCGAGGAAC TGGCAAAA       | 30.34                                  |
|                 | Reverse          | CTCAAAGAGTCTGAGGTAGAAAGAGATAAT |                                        |
| REG3 $\gamma$   | Forward          | GACAAGATGCTTCCCCGTAT           | 20.06                                  |
|                 | Reverse          | GGCATCTTTCTTGGCAACTT           |                                        |
| IL-22           | Forward          | TTGAGGTGTCCAAC TCCAGCA         | 32.25                                  |
|                 | Reverse          | AGCCGGACGTCTGTGTTGTTA          |                                        |
| GPR43           | Forward          | GGCTTCTACAGCAGCATCTA           | 28.26                                  |
|                 | Reverse          | AAGCACACCAGGAAATTAAG           |                                        |
| GPR109A         | Forward          | GGCGTGGTGCAGTGAGCA             | 27.31                                  |
|                 | Reverse          | CTGCAGGACTCTGTCTTCTCAGT        |                                        |
| GPR41           | Forward          | GTGACCATGGGGACAAGCTTC          | 32.15                                  |
|                 | Reverse          | CCCTGGCTGTAGGTTGCATT           |                                        |
