# Supplementary material
Source: PubMed Central journal article supplement (PMC6428608)

# Discovery Sample Analysis

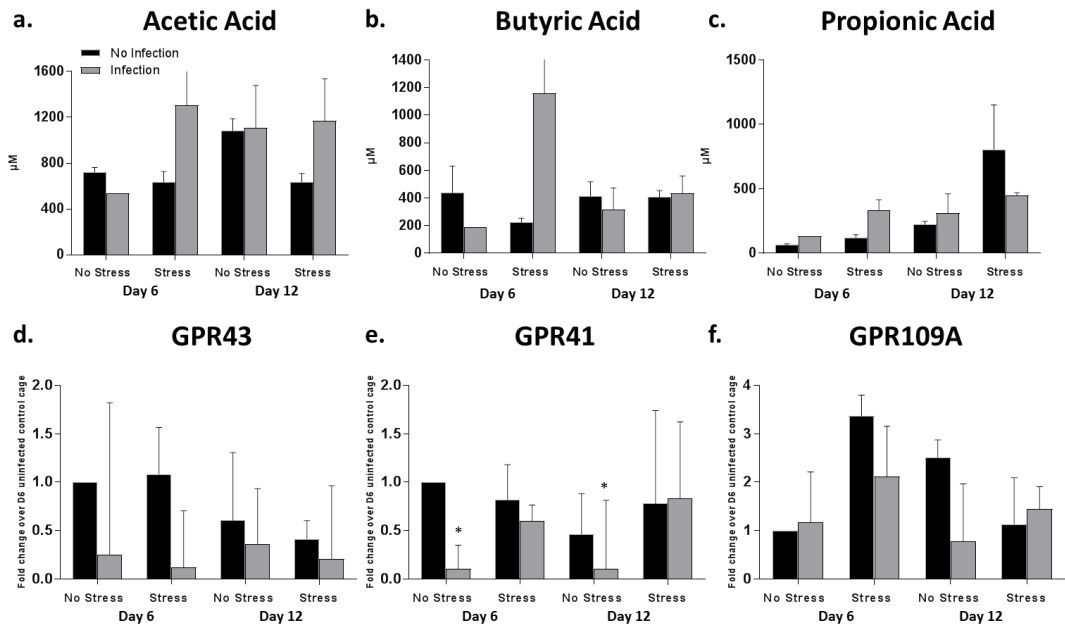

# Validation Sample Analysis

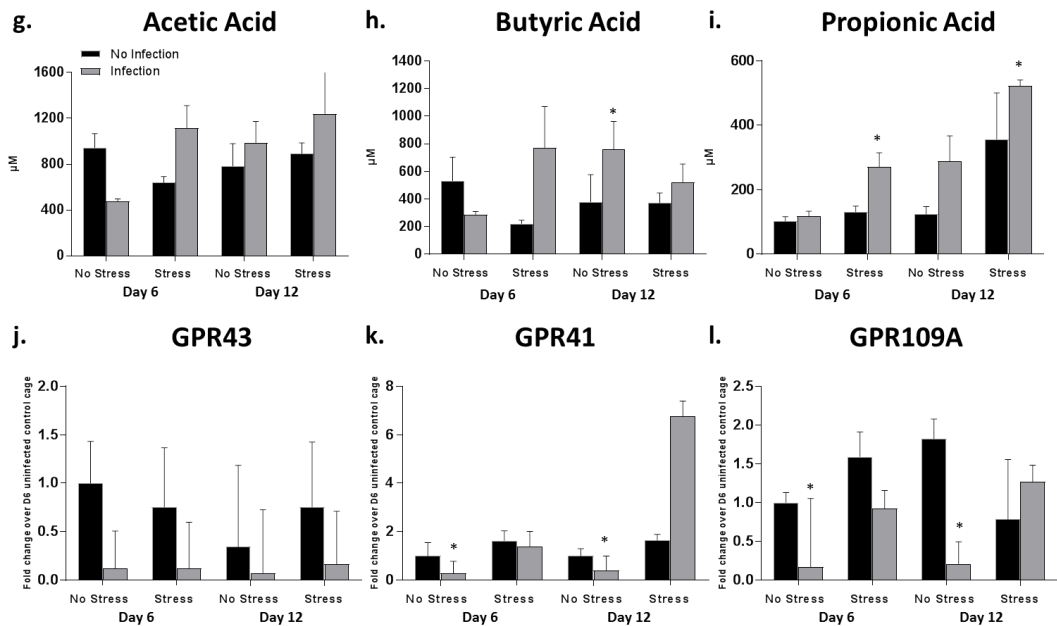

Supplement: NIHMS1515202-supplement-Supplemental_Figure_2.pdf [file NIHMS1515202-supplement-Supplemental_Figure_2.pdf]

# Genera Discovery Sample Analysis

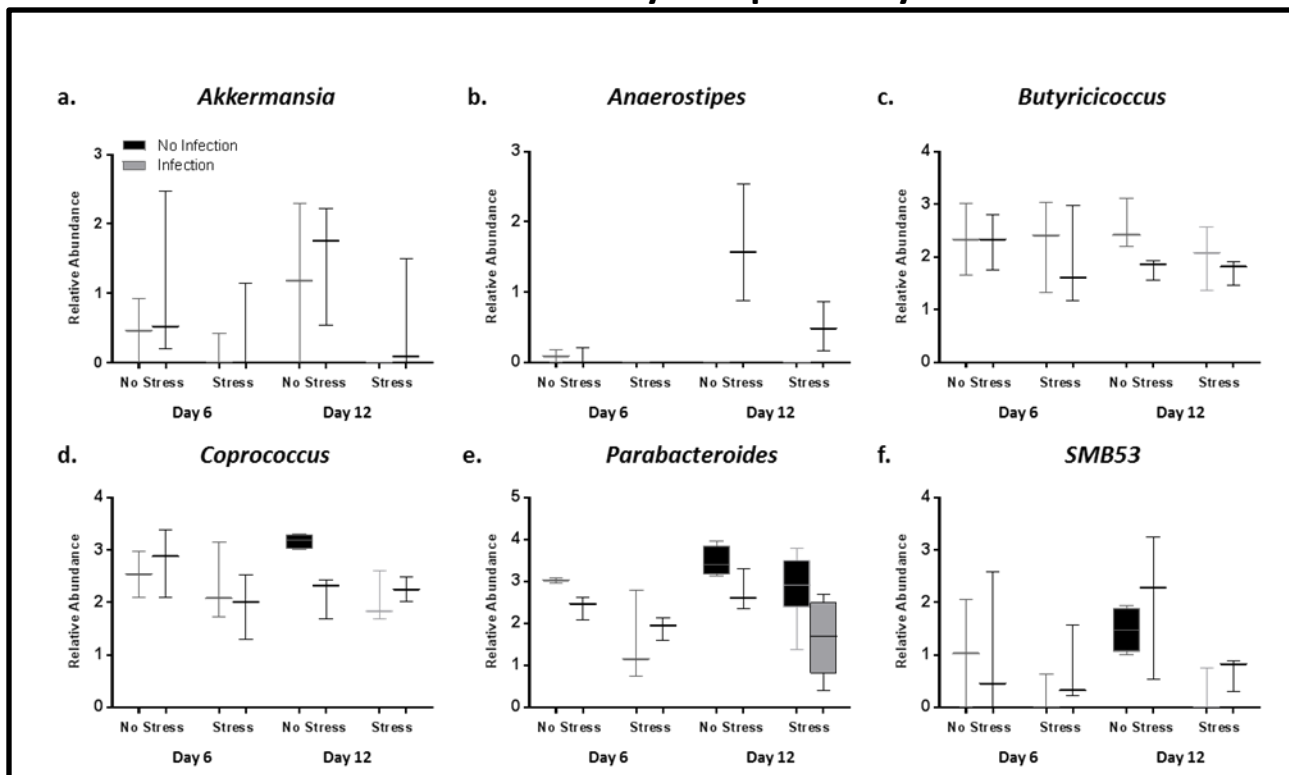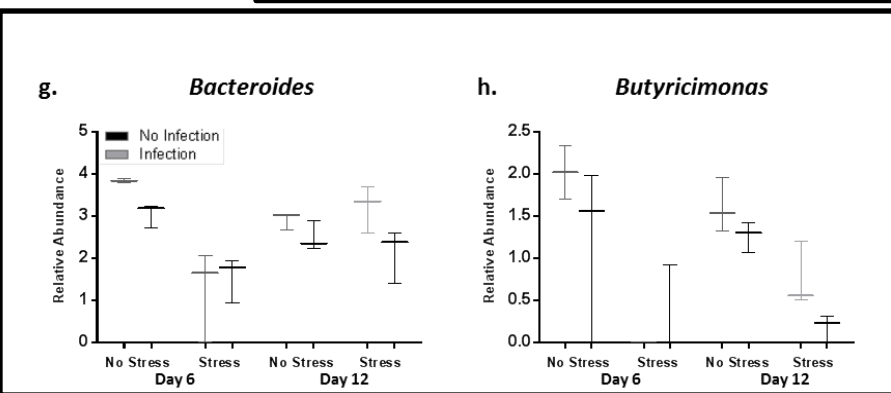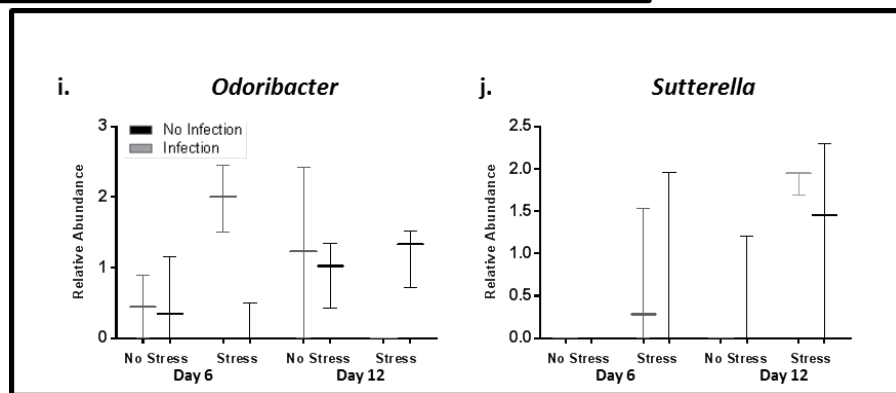

Supplement: NIHMS1515202-supplement-Supplemental_Figure_5.pdf [file NIHMS1515202-supplement-Supplemental_Figure_5.pdf]
